# Supplementary material
Source: ML conference proceedings conference paper supplement (https://proceedings.mlr.press/v80/chatterjee18a.html)
Supplement: Supplementary file 1 [file chatterjee18a-supp.zip]

Archive with 1 entries (1 files):
- supplementary.pdf
